# Supplementary figures and images for: A Genome-Wide Screen for Promoter Methylation in Lung Cancer Identifies Novel Methylation Markers for Multiple Malignancies
Source: PLOS journal article supplement (doi:10.1371/journal.pmed.0030486), 2006-12-20

Fig. S11

# Methylation Analysis of *LOX*

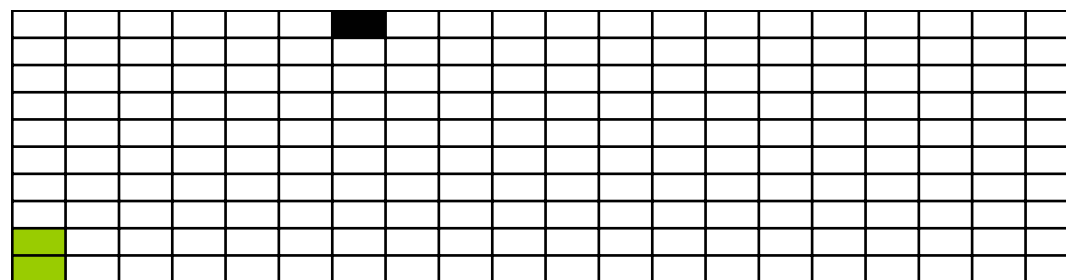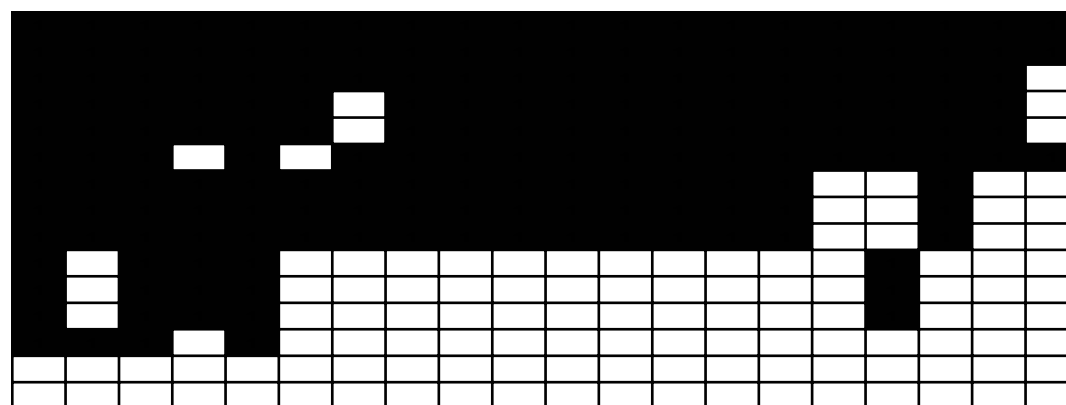

- Methylated
- Unmethylated
- No data

Supplement: S11 (10.1371/journal.pmed.0030486.s011) [file journal.pmed.0030486.s011]

Fig. S1

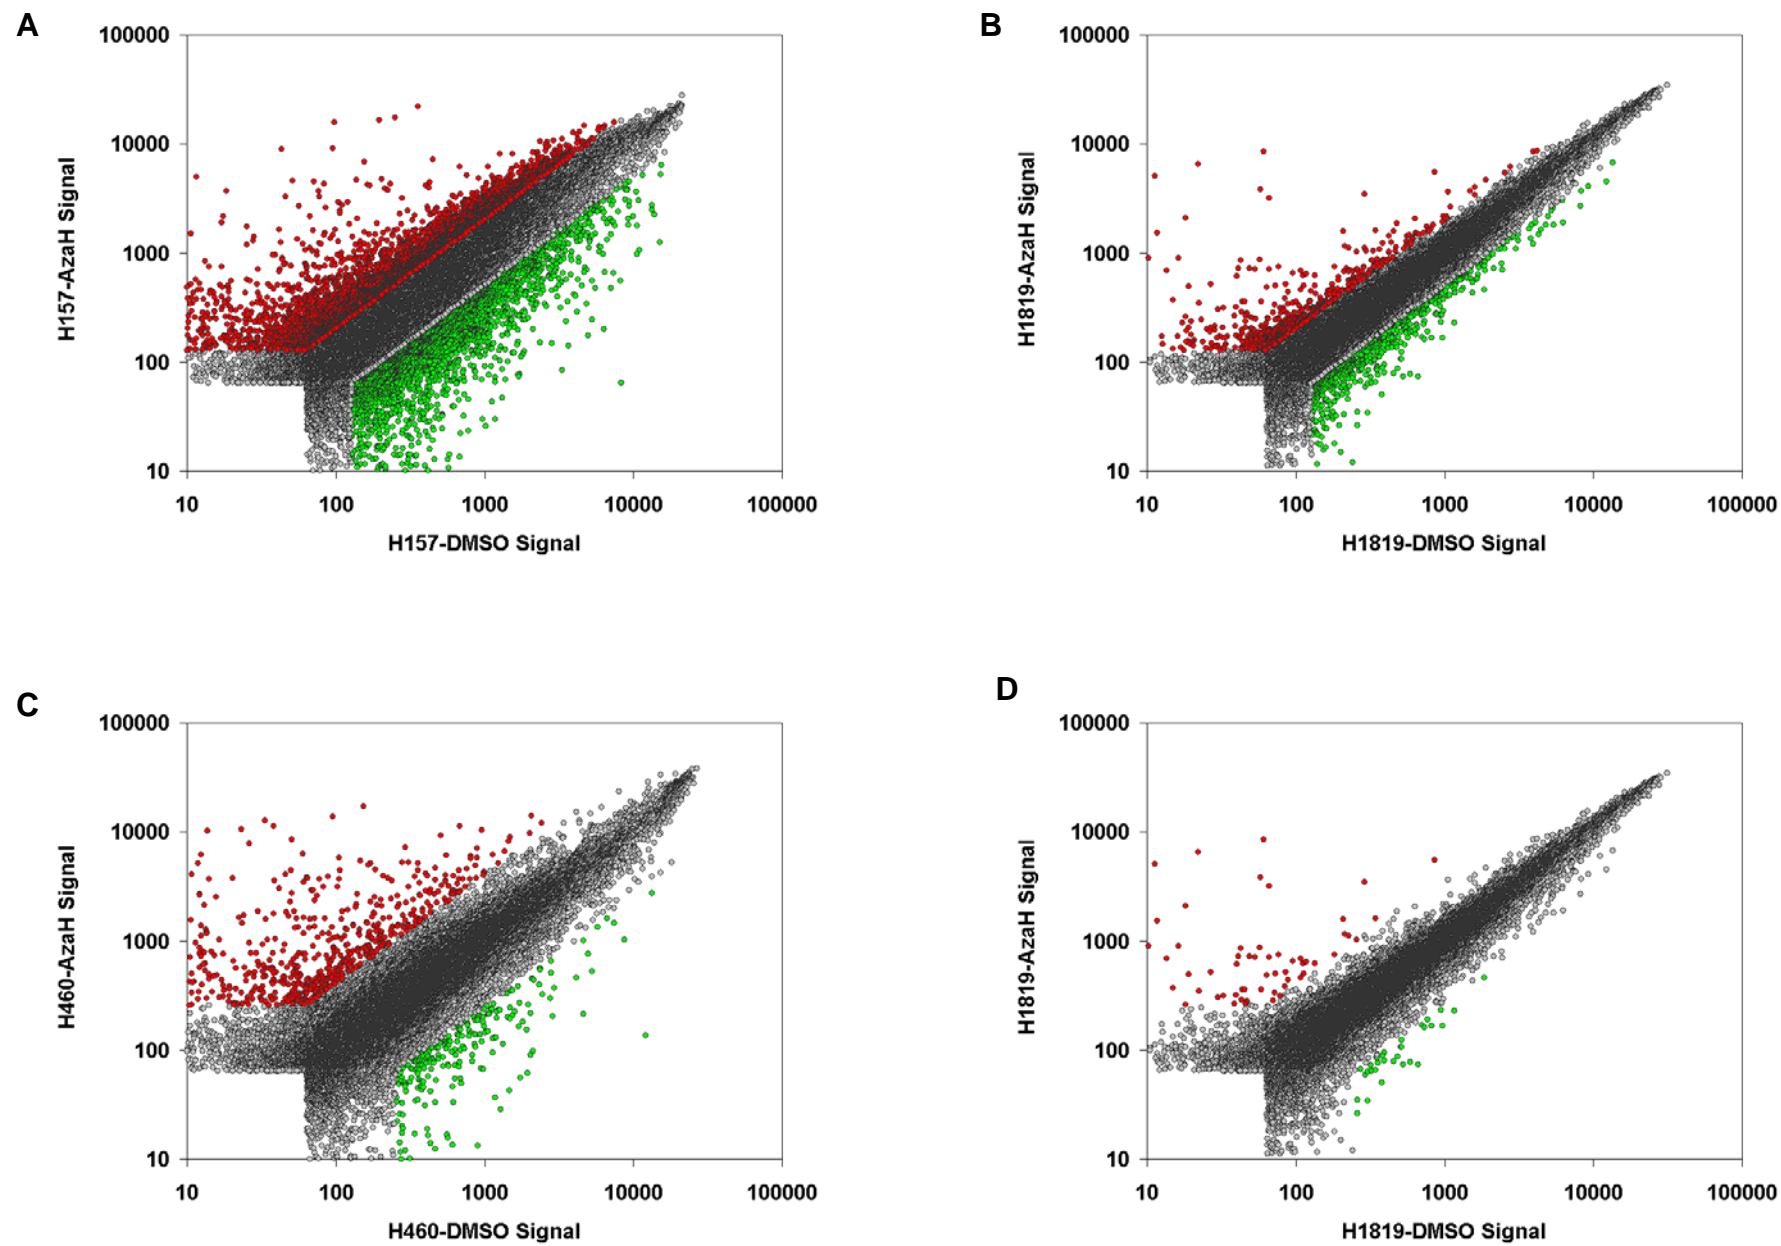

Supplement: S1 (10.1371/journal.pmed.0030486.s001) [file journal.pmed.0030486.sg001.pdf › journal.pmed.0030486.sg001.pdf]

Fig. S2

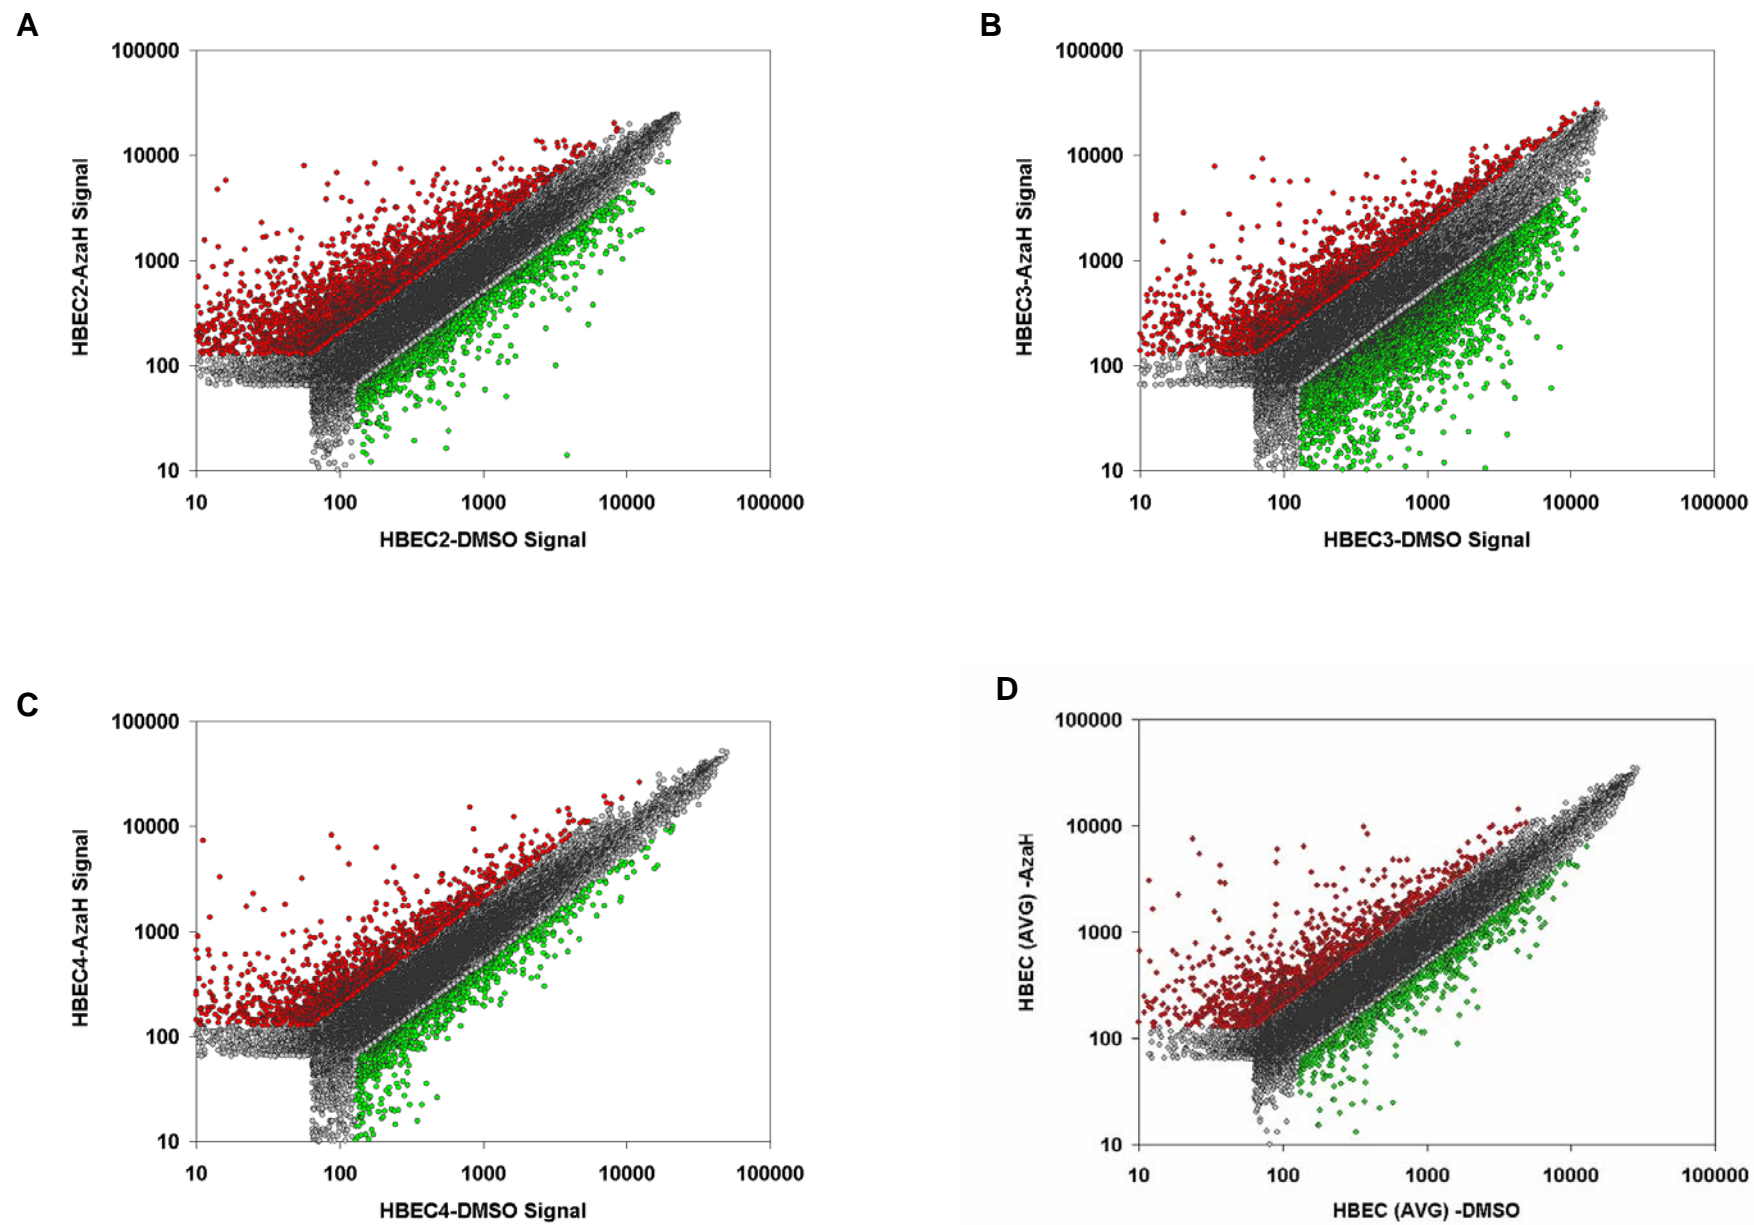

Supplement: S2 (10.1371/journal.pmed.0030486.s002) [file journal.pmed.0030486.sg002.pdf › journal.pmed.0030486.sg002.pdf]

Fig. S3

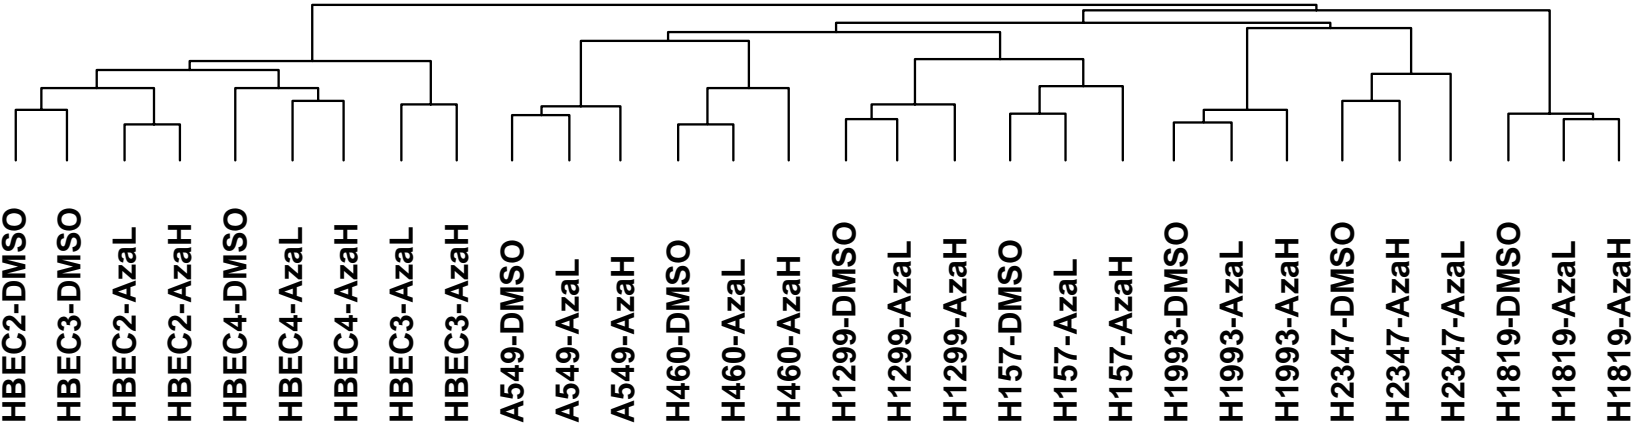

Supplement: S3 (10.1371/journal.pmed.0030486.s003) [file journal.pmed.0030486.sg003.pdf › journal.pmed.0030486.sg003.pdf]

Fig. S4

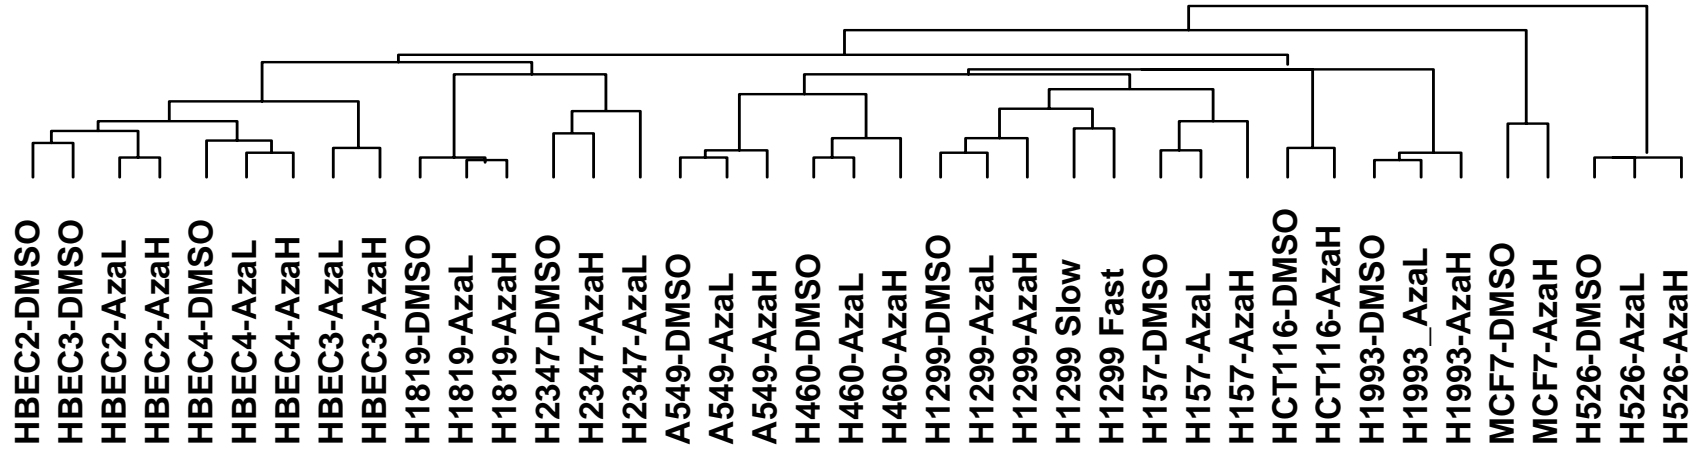

Supplement: S4 (10.1371/journal.pmed.0030486.s004) [file journal.pmed.0030486.sg004.pdf › journal.pmed.0030486.sg004.pdf]

Fig. S5

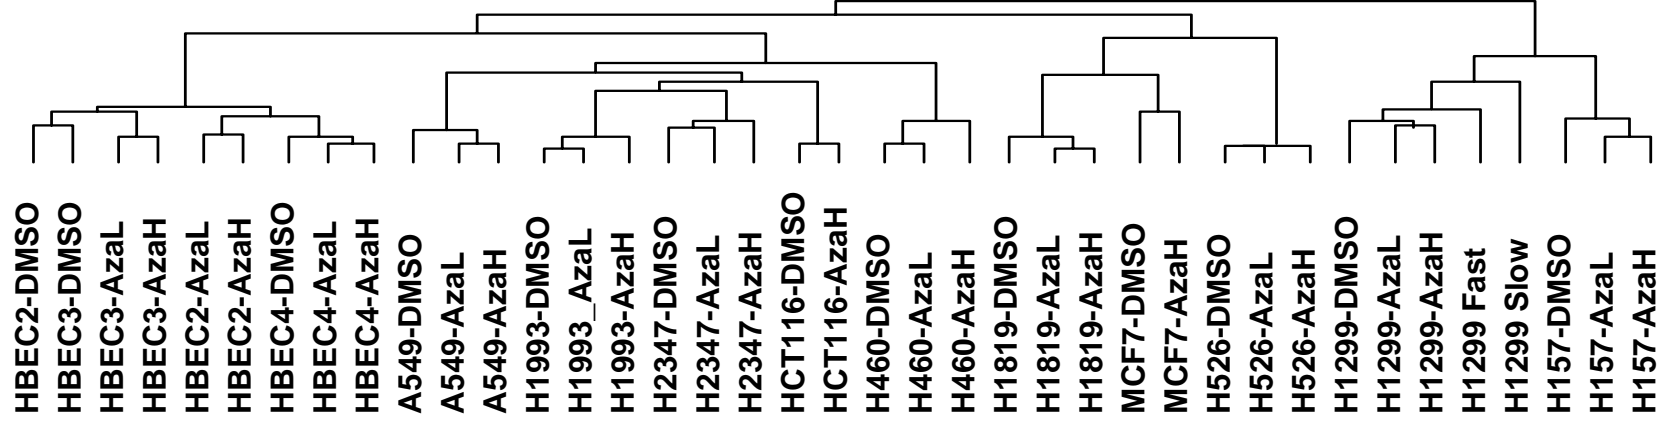

Supplement: S5 (10.1371/journal.pmed.0030486.s005) [file journal.pmed.0030486.sg005.pdf › journal.pmed.0030486.sg005.pdf]

Fig. S6 A

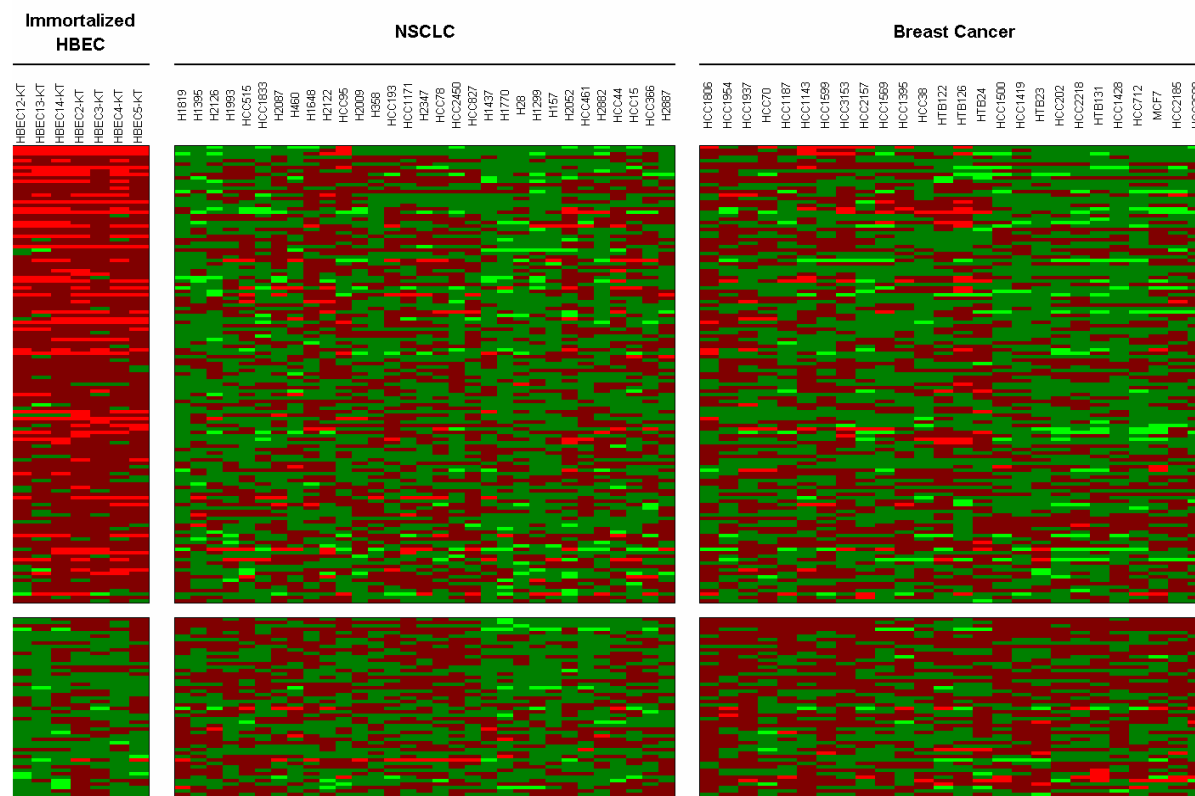

B

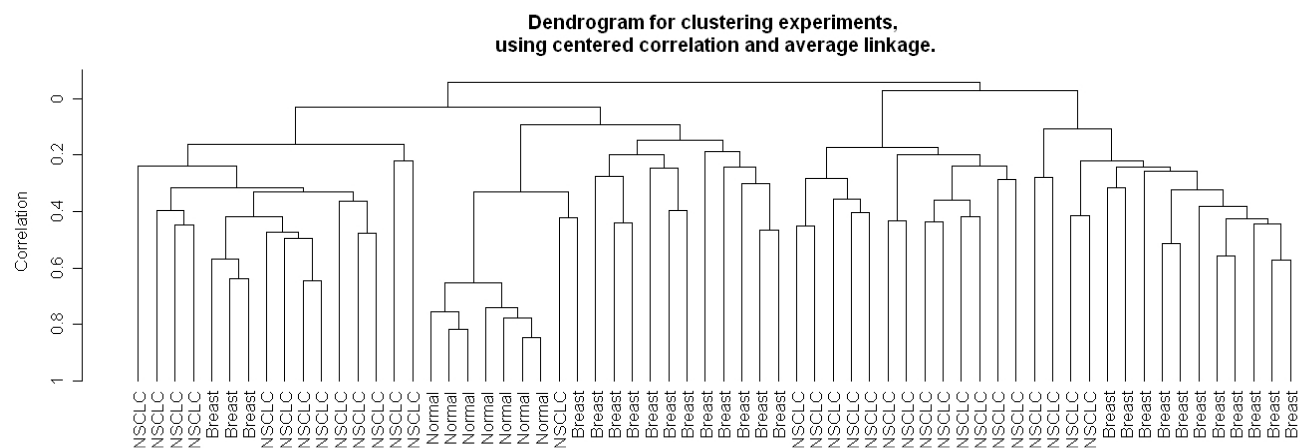

Supplement: S6 (10.1371/journal.pmed.0030486.s006) [file journal.pmed.0030486.sg006.pdf › journal.pmed.0030486.sg006.pdf]

Fig. S7

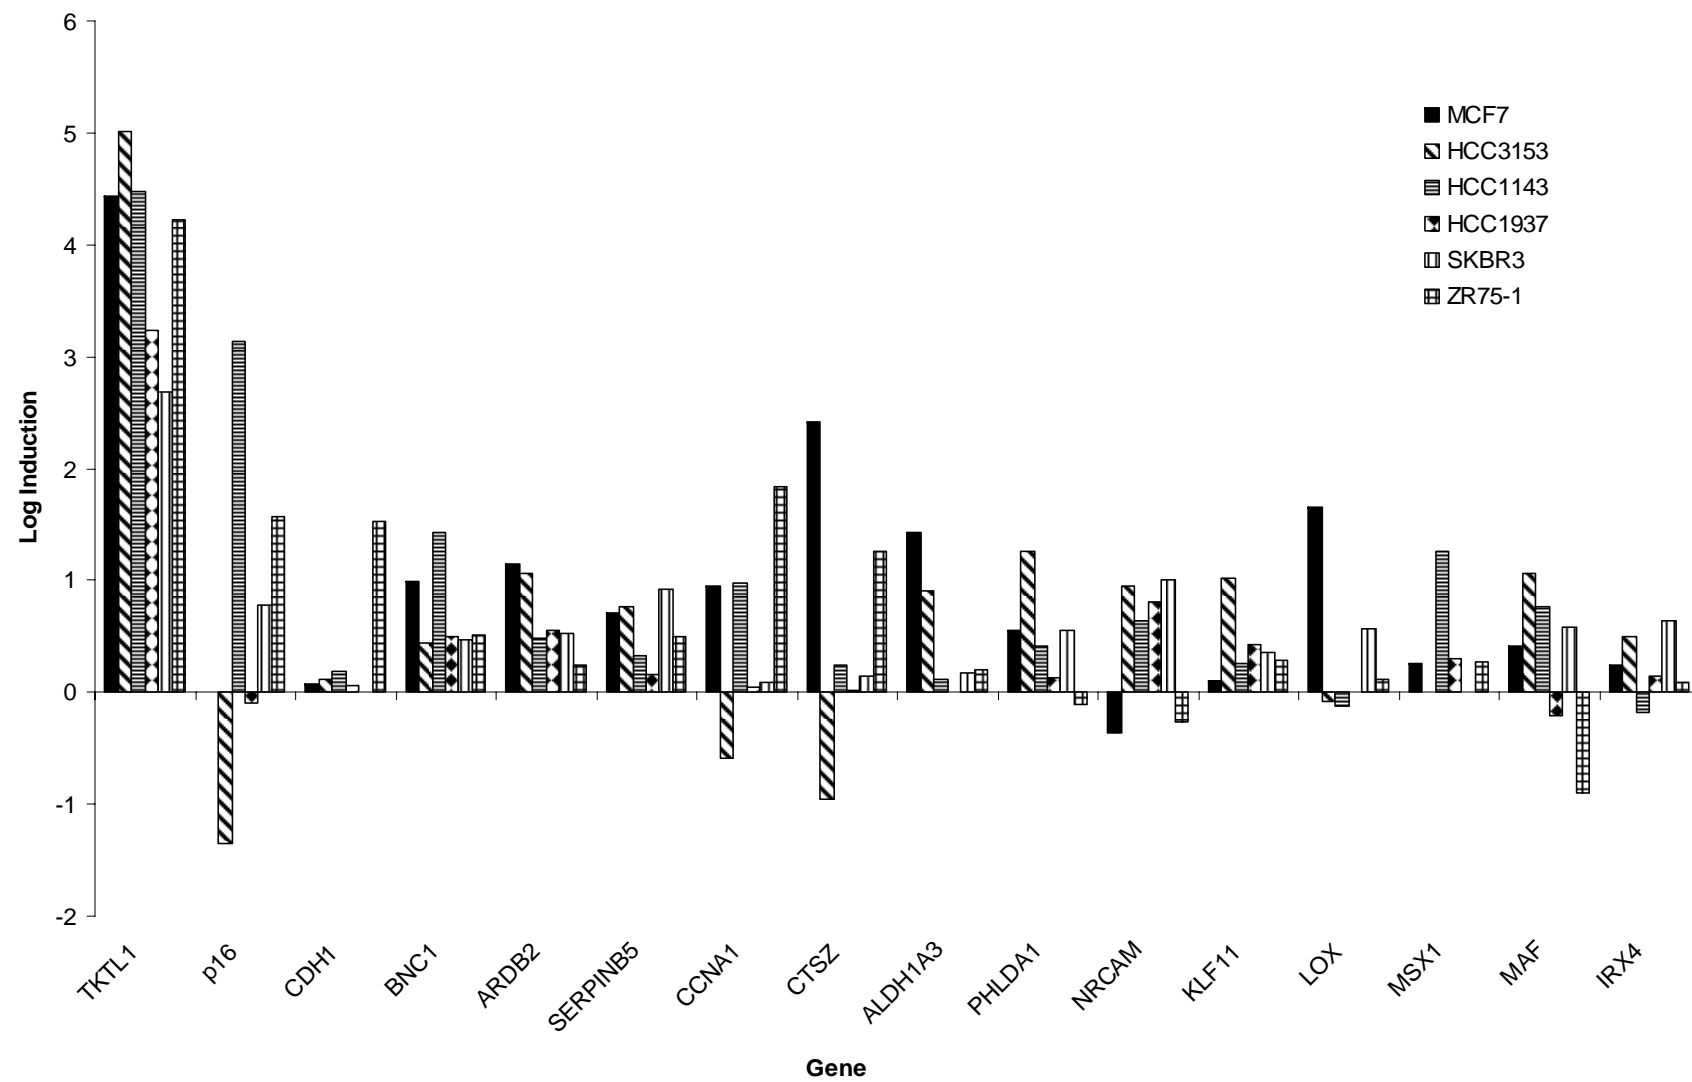

Supplement: S7 (10.1371/journal.pmed.0030486.s007) [file journal.pmed.0030486.sg007.pdf › journal.pmed.0030486.sg007.pdf]

Fig. S8

# Methylation Analysis of *BNC1*

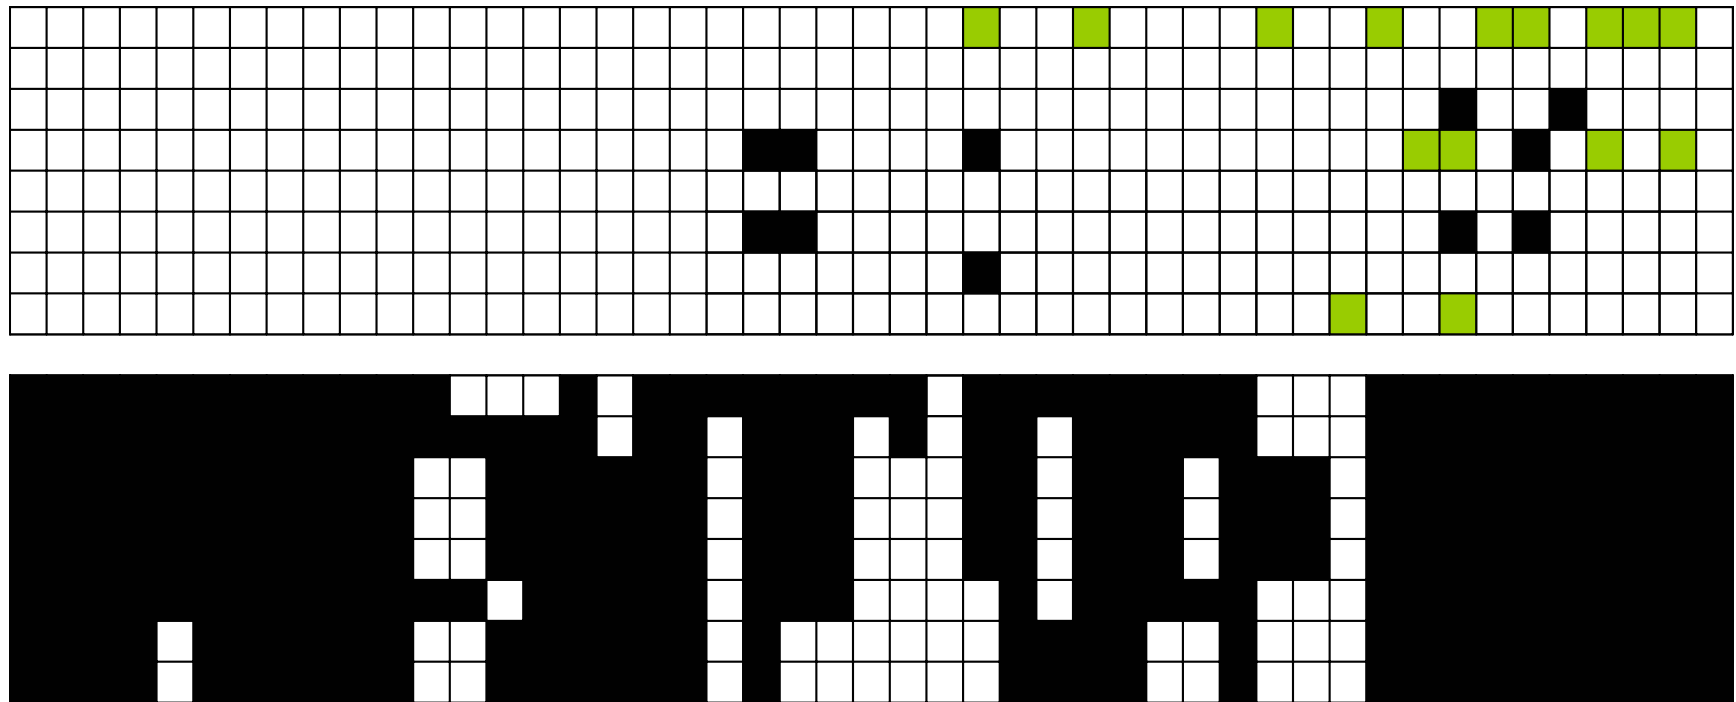

- Methylated
- Unmethylated
- No data

Supplement: S8 (10.1371/journal.pmed.0030486.s008) [file journal.pmed.0030486.sg008.pdf › journal.pmed.0030486.sg008.pdf]

Fig. S9

# Methylation Analysis of *MSX1*

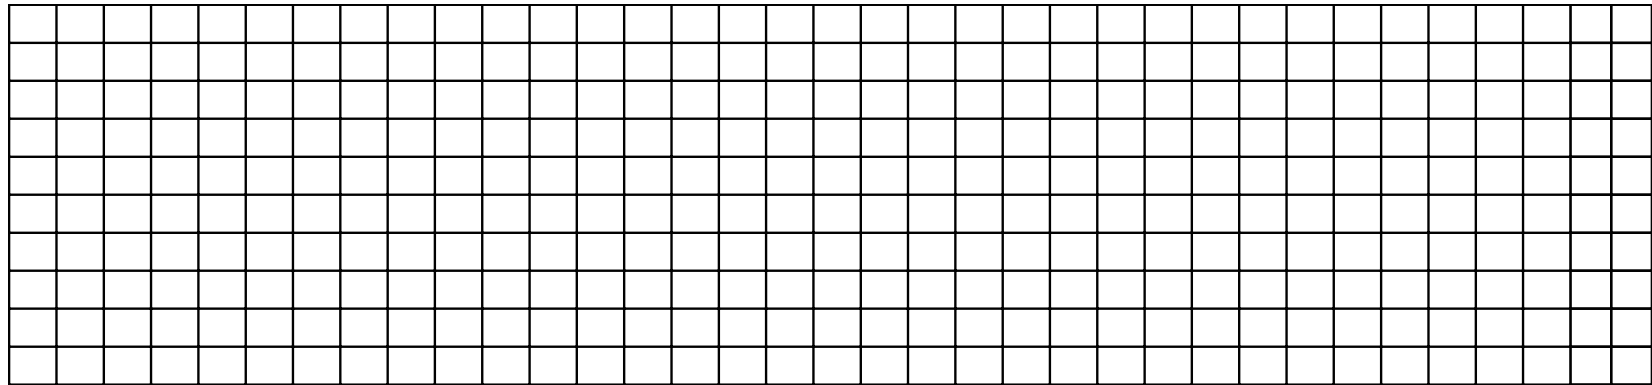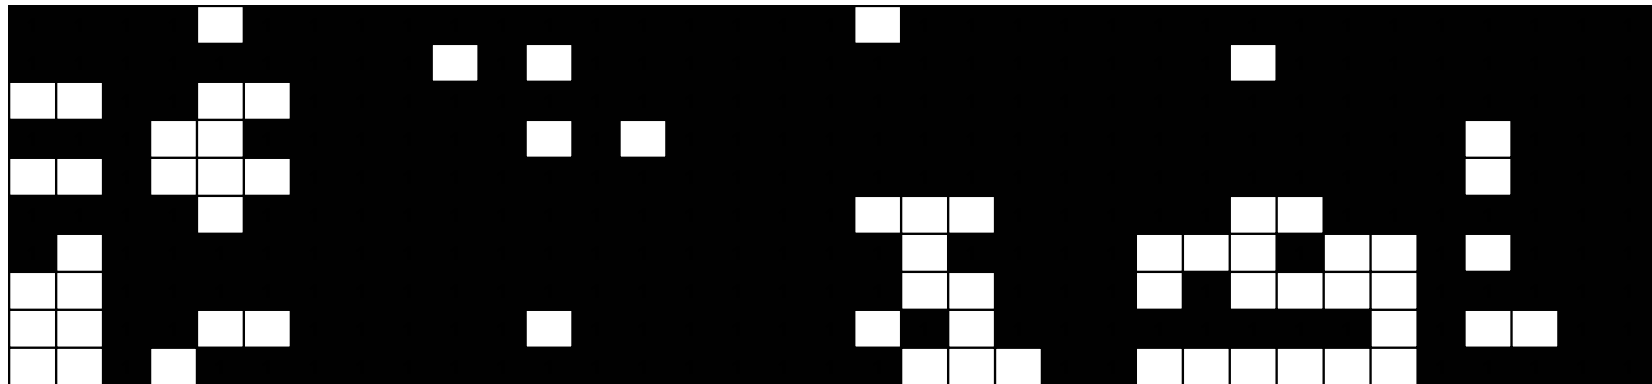

- Methylated
- Unmethylated
- No data

Supplement: S9 (10.1371/journal.pmed.0030486.s009) [file journal.pmed.0030486.sg009.pdf › journal.pmed.0030486.sg009.pdf]

Fig. S10

## Methylation Analysis of *ALDH1A3*

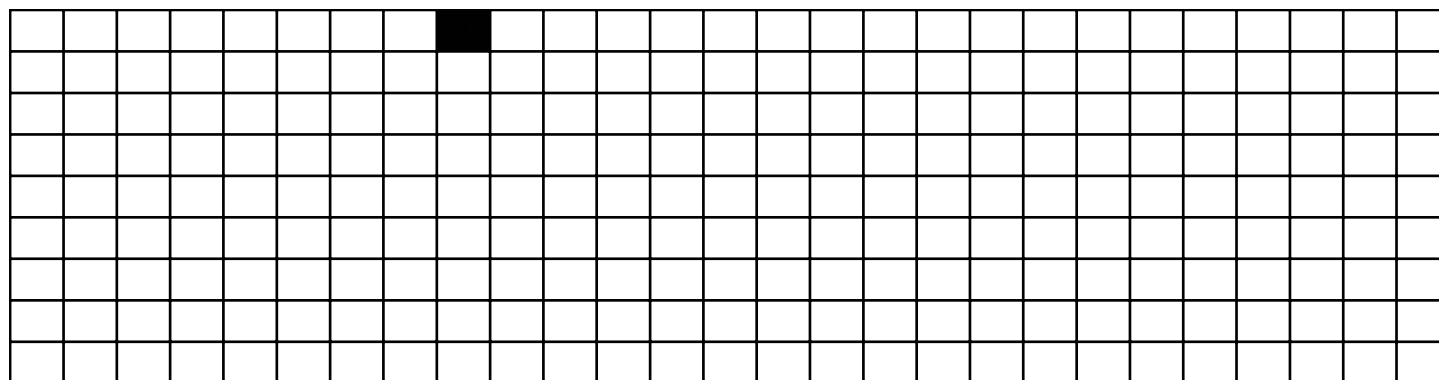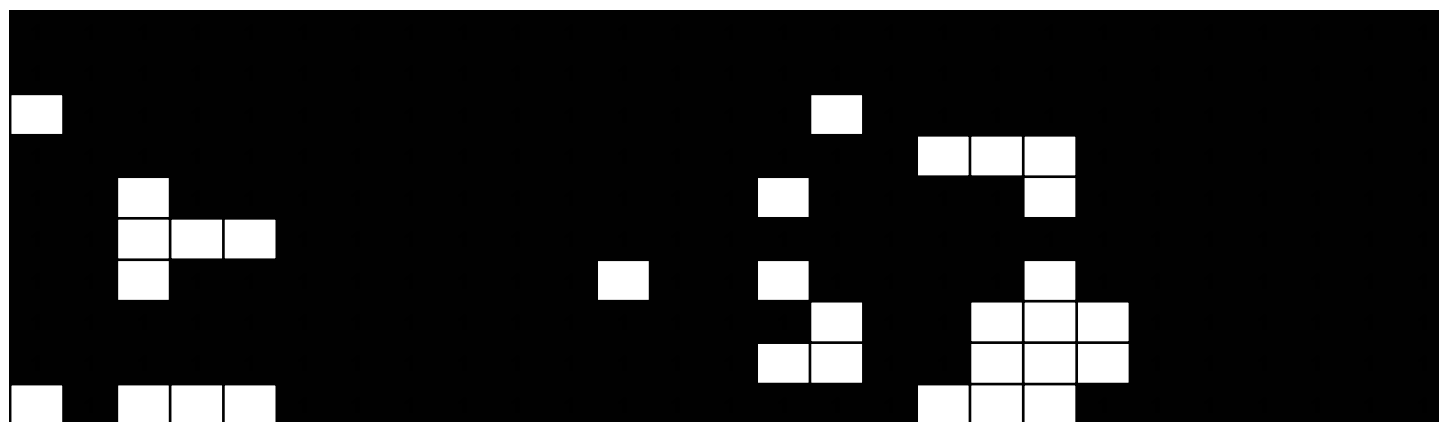

 Methylated  
 Unmethylated  
 No data

Supplement: S10 (10.1371/journal.pmed.0030486.s010) [file journal.pmed.0030486.sg010.pdf › journal.pmed.0030486.sg010.pdf]

Fig. S12

# Methylation Analysis of *CTSZ*

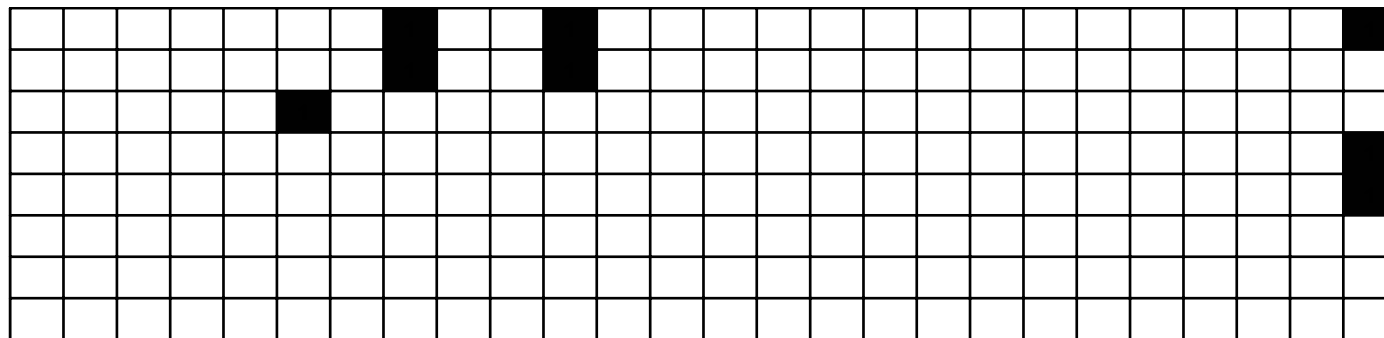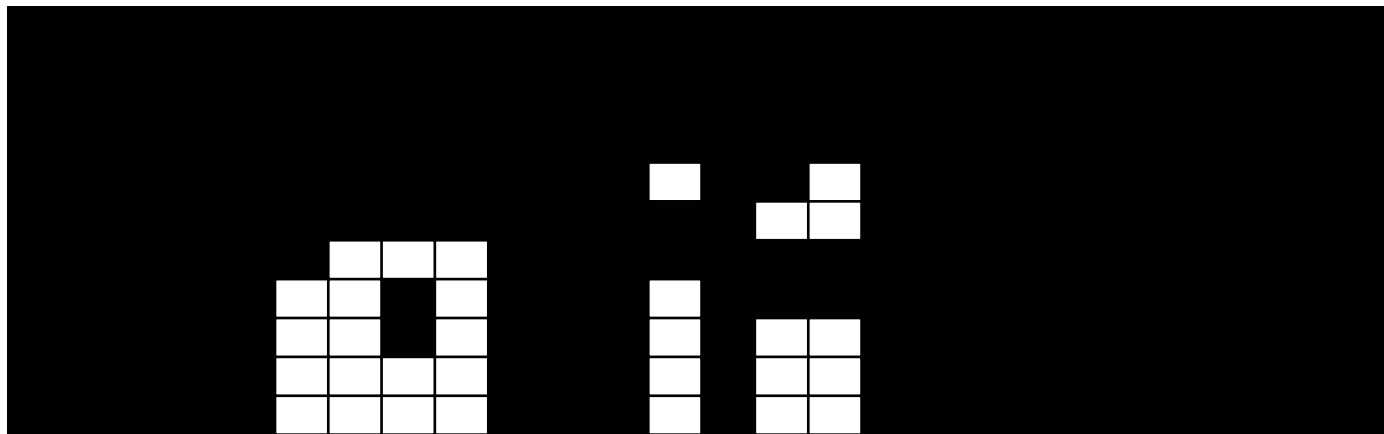

- Methylated
- Unmethylated
- No data

Supplement: S12 (10.1371/journal.pmed.0030486.s012) [file journal.pmed.0030486.sg012.pdf › journal.pmed.0030486.sg012.pdf]

Fig. S13

# Methylation Analysis of *SOX15*

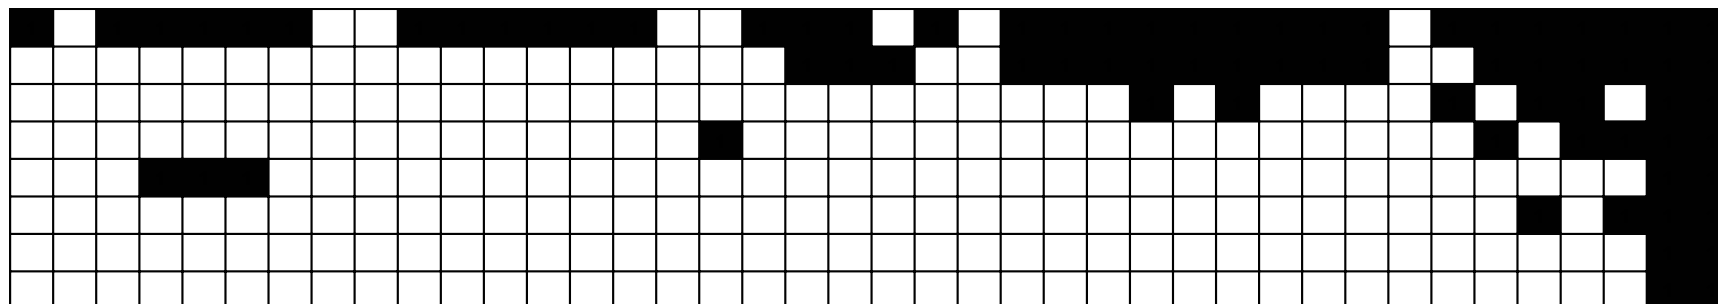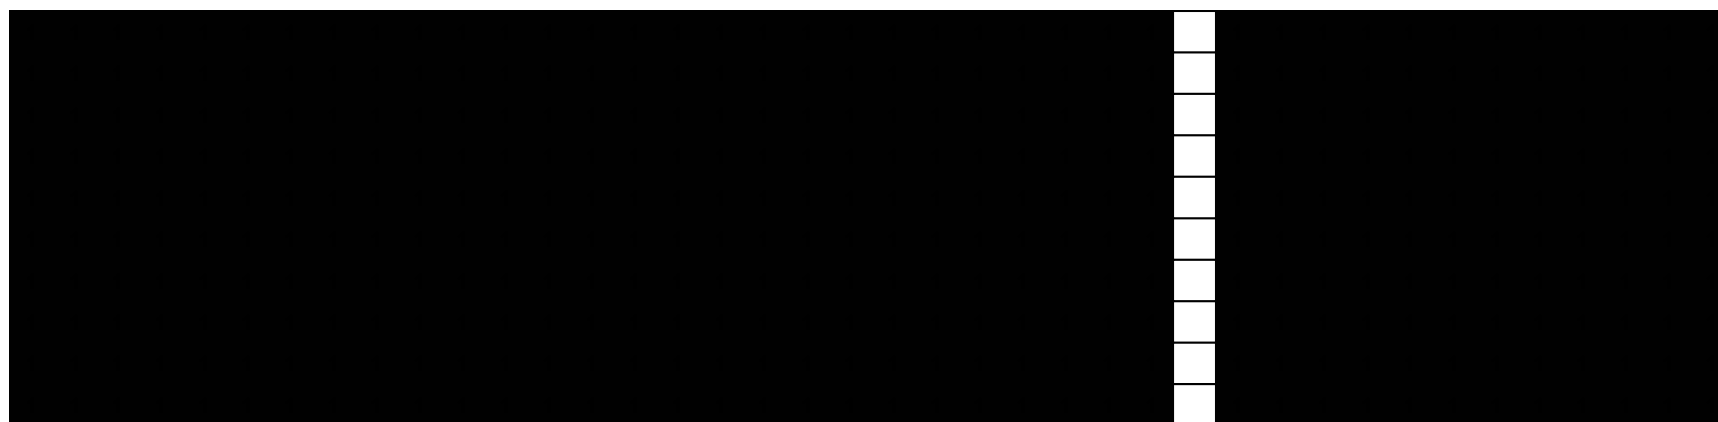

- Methylated
- Unmethylated
- No data

Supplement: S13 (10.1371/journal.pmed.0030486.s013) [file journal.pmed.0030486.sg013.pdf › journal.pmed.0030486.sg013.pdf]

Fig. S14

# Methylation Analysis of *CCNA1*

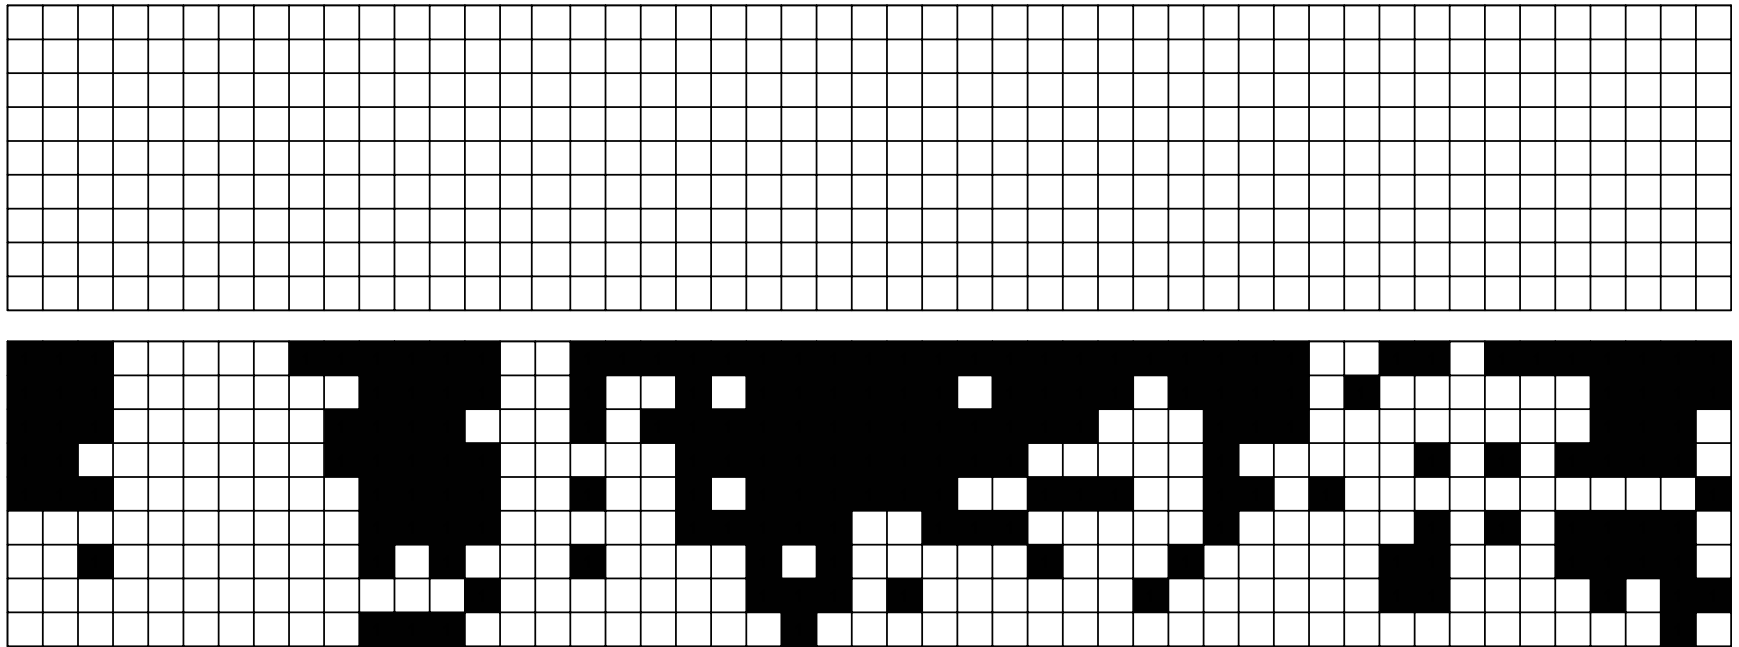

- Methylated
- Unmethylated
- No data

Supplement: S14 (10.1371/journal.pmed.0030486.s014) [file journal.pmed.0030486.sg014.pdf › journal.pmed.0030486.sg014.pdf]
